# Supplementary material for: Investigating the effectiveness of care delivery at an acute geriatric community hospital for older adults in the Netherlands: a protocol for a prospective controlled observational study
Source: PubMed Central journal article supplement (PMC7170597; doi:10.1136/bmjopen-2019-033802), 2020-03-31
Supplement: bmjopen-2019-033802supp002.pdf [file bmjopen-2019-033802supp002.pdf]

**Supplementary table** Overview of the content and description of (outcome) measurements and timing of measurements at the Acute Geriatric Community Hospital compared to the measurements available in the two control groups.

|                                                             | Description and/or instrument                                                               | H1              | H2  | P1  | P3  | P6  |
|-------------------------------------------------------------|---------------------------------------------------------------------------------------------|-----------------|-----|-----|-----|-----|
| <i>1. Medical and demographical data</i>                    |                                                                                             |                 |     |     |     |     |
| <b>Sociodemographic data</b>                                | Date of birth, age at admission, sex, level of education, living conditions, marital status | T A             |     |     |     |     |
| <b>Data on admission</b>                                    | Time spent at the ED*, admission diagnosis, date and time of admission                      | T A             |     |     |     |     |
| <b>Chronic conditions</b>                                   | Charlson Comorbidity Index <sup>38</sup>                                                    | T A             |     |     |     |     |
| <b>Polypharmacy</b>                                         | Number of drugs                                                                             | T A             |     |     |     |     |
| <b>Mortality</b>                                            | Date of death                                                                               |                 |     |     | T A |     |
| <i>2. Cognitive functioning</i>                             |                                                                                             |                 |     |     |     |     |
| <b>Cognitive impairment</b>                                 | Mini Mental State Examination (MMSE)                                                        | T A             |     |     |     |     |
| <b>Delirium</b>                                             | Safety management system patient screening (VMS) <sup>41</sup>                              | T               |     |     |     |     |
|                                                             | Confusion Assessment Method (CAM) <sup>39</sup>                                             | TA <sup>+</sup> |     |     |     |     |
|                                                             | Delirium Observation Scale (DOS) <sup>42</sup>                                              | T <sup>+</sup>  | T   |     |     |     |
| <i>3. Psychosocial functioning and quality of life</i>      |                                                                                             |                 |     |     |     |     |
| <b>Apathy</b>                                               | Geriatric Depression Scale (GDS-3) <sup>43</sup>                                            | A               | A   | A   | A   |     |
| <b>Social network and informal care</b>                     | Presence and frequency of informal care                                                     | T               |     | -   | -   | T   |
| <b>Quality of life and health status</b>                    | EQ-5D <sup>36</sup>                                                                         | T A             |     | A   | A   | T A |
| <i>4. Physical functioning</i>                              |                                                                                             |                 |     |     |     |     |
| <b>Identifying at-risk-patients</b>                         | ISAR-HP- Identifying Seniors at Risk score <sup>44</sup>                                    | T               |     |     |     |     |
| <b>Functional status</b>                                    | Activities of daily Living (ADL) modified Katz-ADL score <sup>35</sup>                      | T A             | A   | A   | A   | T   |
| <b>(Im)mobility</b>                                         | Using walking aid, information from the Katz-ADL questions on exercise                      | T A             |     |     |     |     |
| <b>Handgrip strength</b>                                    | Jamar <sup>48</sup>                                                                         | T A             | A   |     |     |     |
| <b>Gait speed</b>                                           | Short Physical Performance Battery SPPB <sup>49</sup>                                       | T A             | A   |     |     |     |
| <b>Falling</b>                                              | Fall history                                                                                | T A             | -   | A   | A   | T   |
|                                                             | Falls in the AGCH                                                                           | n/a             | n/a | n/a | n/a | n/a |
|                                                             | Numeric Rating Scale (NRS) on the fear of falling <sup>34</sup>                             | A               | A   | A   | A   | -   |
| <b>Pain</b>                                                 | Numeric Rating Scale (NRS) on pain <sup>50</sup>                                            | T A             | A   | A   | A   | -   |
| <b>Fatigue</b>                                              | Numeric Rating Scale (NRS) on fatigue <sup>51</sup>                                         | T A             | A   | A   | A   | -   |
| <b>Nutrition</b>                                            | Short Nutritional Assessment Questionnaire (SNAQ) <sup>52</sup>                             | T A             |     |     |     |     |
| <i>5. Healthcare utilization and satisfaction with care</i> |                                                                                             |                 |     |     |     |     |
| <b>Medical care during admission</b>                        | Diagnostics performed in the AGCH<br>Readmission to university hospital                     |                 | n/a |     |     |     |

|                                |                                                                                 |   |   |   |     |   |
|--------------------------------|---------------------------------------------------------------------------------|---|---|---|-----|---|
|                                | Length of stay at the AGCH                                                      |   |   |   |     |   |
| <b>Hospital readmission</b>    | Readmission rate to the hospital or AGCH                                        |   |   | A | T A | T |
| <b>Health care utilization</b> | Home care, medical specialist care, temporary institutional care, primary care. | T |   | A | A   | T |
| <b>Satisfaction with Care</b>  | Eight question questionnaire <sup>53</sup>                                      |   | - | - |     |   |

Grey tone= measurement in prospective cohort study at the AGCH.

H1= at admission, H2= at discharge, P1= one month after discharge, P3 = three months after discharge, P6 = six months after discharge.

T= available from *Transitional Care Bridge study(TCB)*<sup>1</sup>

A= available from *Hospital- ADL study(H-ADL)*<sup>2</sup>

\* and - =Not available from TCB or H-ADL

<sup>†</sup>=Single baseline measurement

n.a.= not applicable
